# Supplementary material for: The quality of the fossil record across higher taxa: compositional fidelity of phyla and classes in benthic marine associations
Source: PeerJ journal article supplement (doi:10.7717/peerj.15574), 2023-07-11
Supplement: FigS1_Map.pdf [file FigS1_Map.pdf]

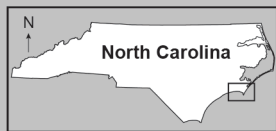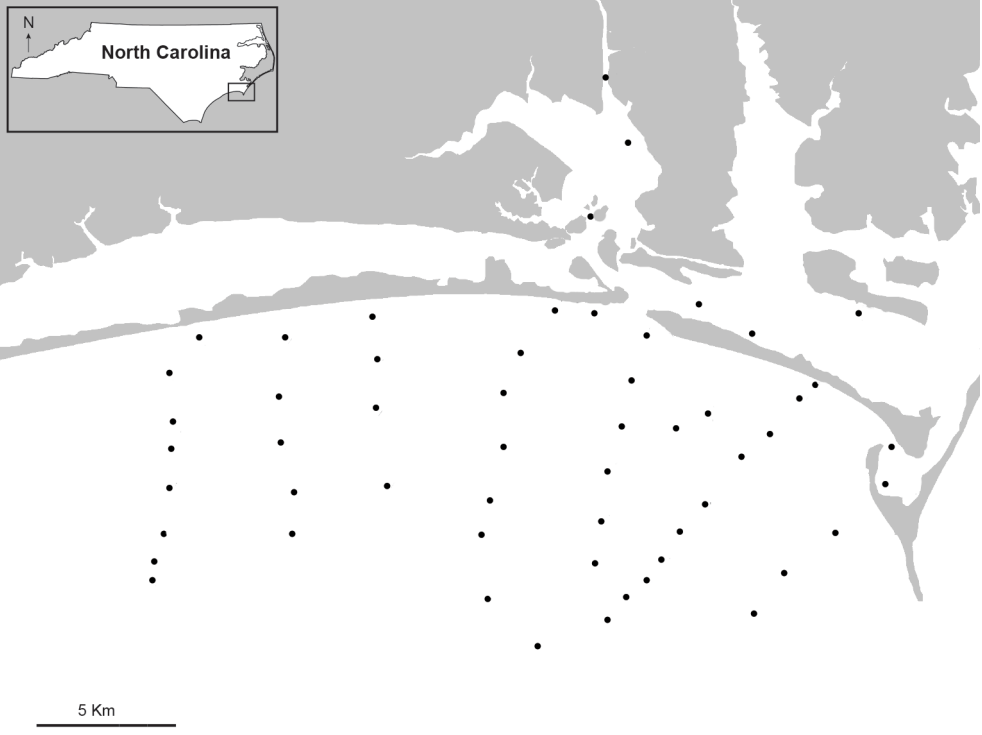

5 Km
