# Supplementary material for: The quality of the fossil record across higher taxa: compositional fidelity of phyla and classes in benthic marine associations
Source: PeerJ journal article supplement (doi:10.7717/peerj.15574), 2023-07-11

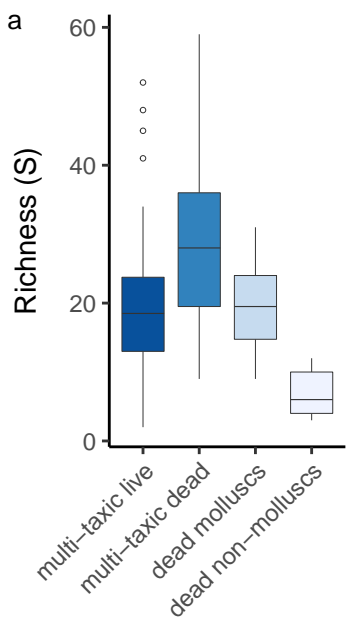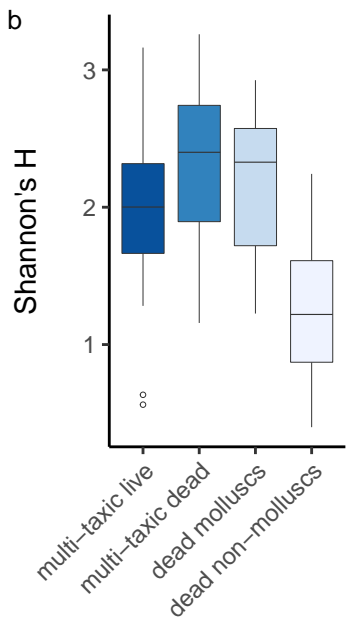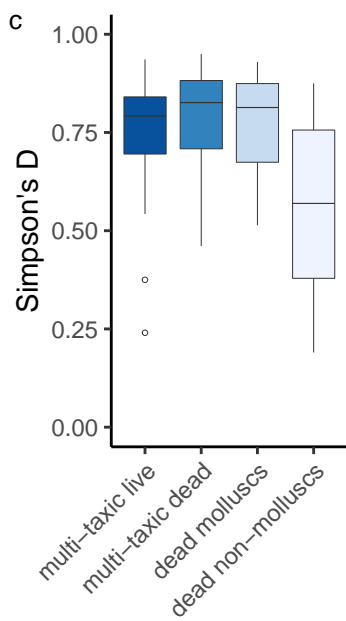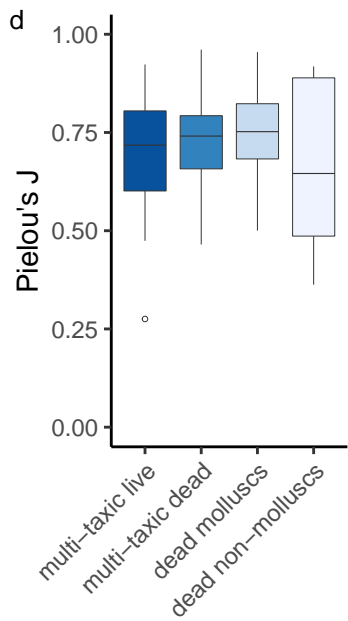

Supplement: FigS6_Diversity_Revised.pdf [file FigS6_Diversity_Revised.pdf]
